# Supplementary material
Source: publisher figshare collection journal article supplement (https://gsajournals.figshare.com/ndownloader/files/20973666)
Supplement: Supplementary file 1 [file 20973666]

## Sheet: Table S5
Table S5	BUSCO summary
BUSCO set	Total BUSCO	Complete single-copy	Complete duplicated	Fragmented	Missing
Arthropoda	1066	963	219	37	66
Insecta	1658	1143	329	58	128
Eukaryota	303	198	71	14	20
